# Supplementary material for: Upcycled Graphene Oxide Nanosheets for Reversible Room Temperature NO2 Gas Sensor
Source: MDPI journal article supplement (doi:10.3390/chemosensors12060108), 2024-06-10
Supplement: s1 [file chemosensors-3016242-supplementary.pdf › chemosensors-3016242-supplementary.pdf]

# Supplemental information of

Upcycled graphene oxide nanosheet for reversible room temperature

NO<sub>2</sub> gas sensor.

*Vien Trinh<sup>1</sup>, Kai Xu<sup>1\*</sup>, Hao Yu<sup>2</sup>, Nam Ha<sup>1</sup>, Yihong Hu<sup>1</sup>, Muhammad Waqas Khan<sup>1</sup>, Rui Ou<sup>1</sup>, Yange Luan<sup>1</sup>, Jiaru Zhang<sup>1</sup>, Qijie Ma<sup>1</sup>, Guanghui Ren<sup>1</sup>, and Jian Zhen Ou<sup>1,2,\*</sup>*

1 School of Engineering, RMIT University, Melbourne, VIC 3000, Australia

2 Key Laboratory of Advanced Technologies of Materials, Ministry of Education, School of Materials Science and Engineering, Southwest Jiaotong University, Chengdu 610031, China

E-mail: [kai.xu@rmit.edu.au](mailto:kai.xu@rmit.edu.au), [jianzhen.ou@rmit.edu.au](mailto:jianzhen.ou@rmit.edu.au)

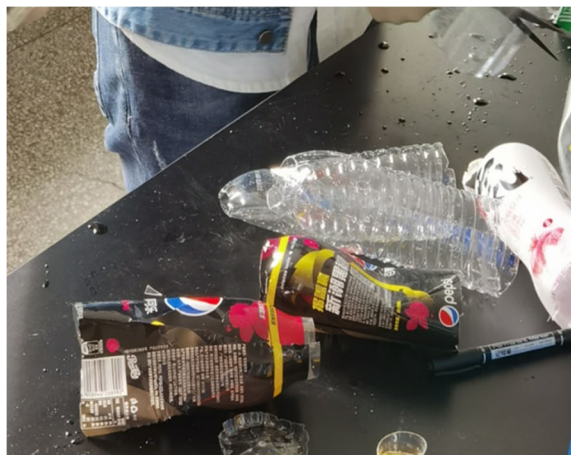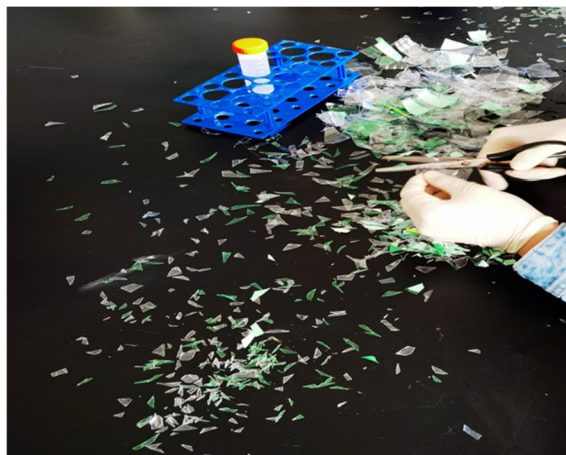

Figure S1: Plastic beverage bottles made of PET material are acquired, the hard parts at both ends are removed, and the thin middle section is cut into pieces.

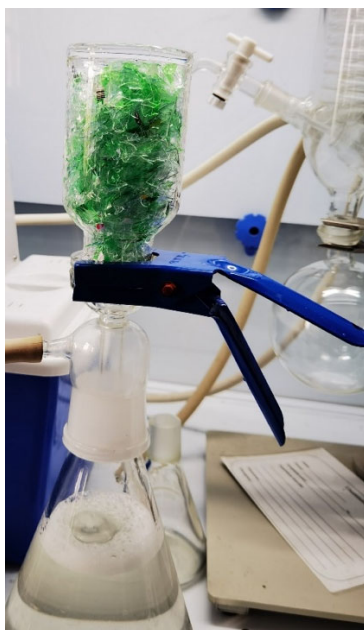

Figure S2: Plastic fragments are vacuum dried after chemical treatment.

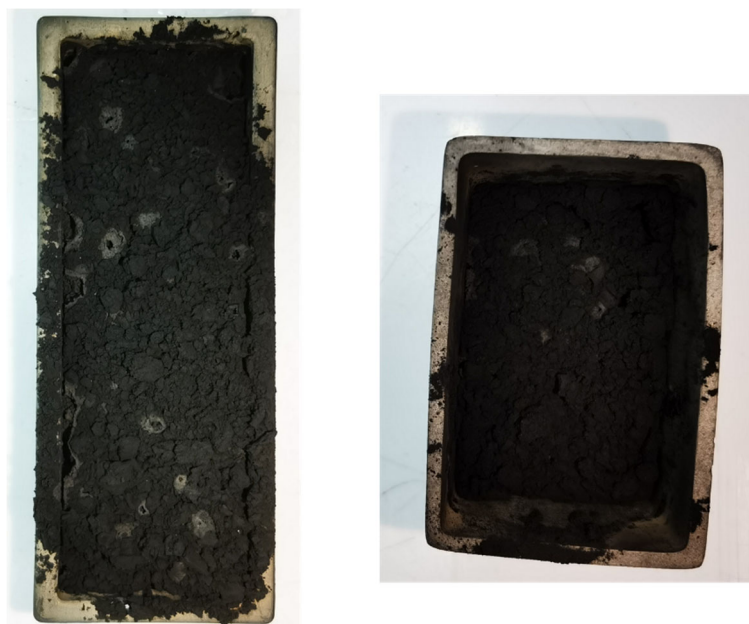

Figure S3: Graphene oxide black powder obtain after thermal treatments.

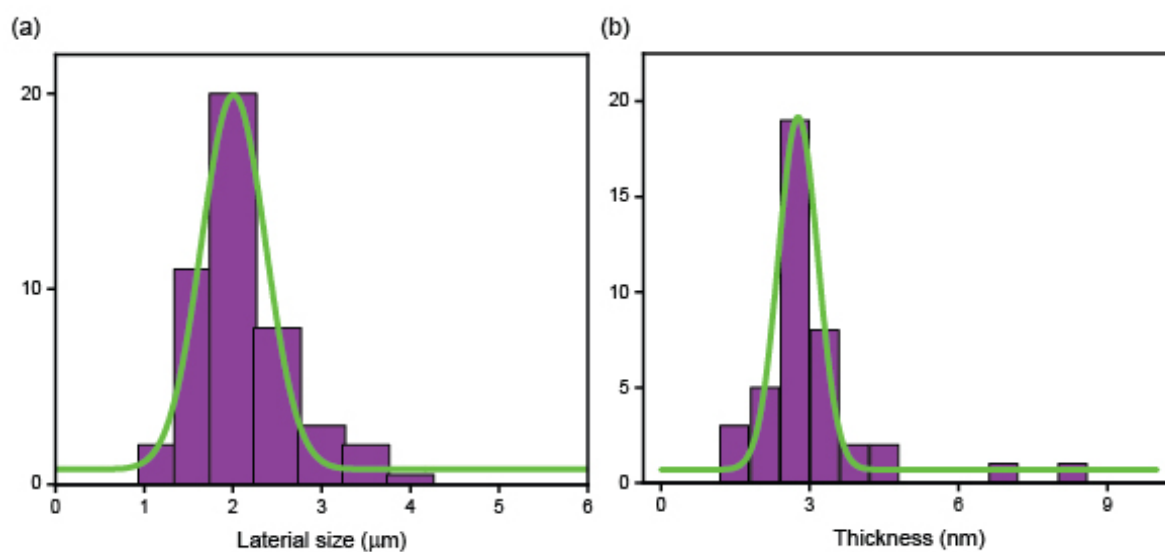

Figure S4: The statistical distribution of the lateral dimension (a) and thickness (b), in which the thickness distribution has a peak at  $\sim 3$  nm and the lateral size is mainly ranging between 1.8 to 2.3  $\mu\text{m}$ .

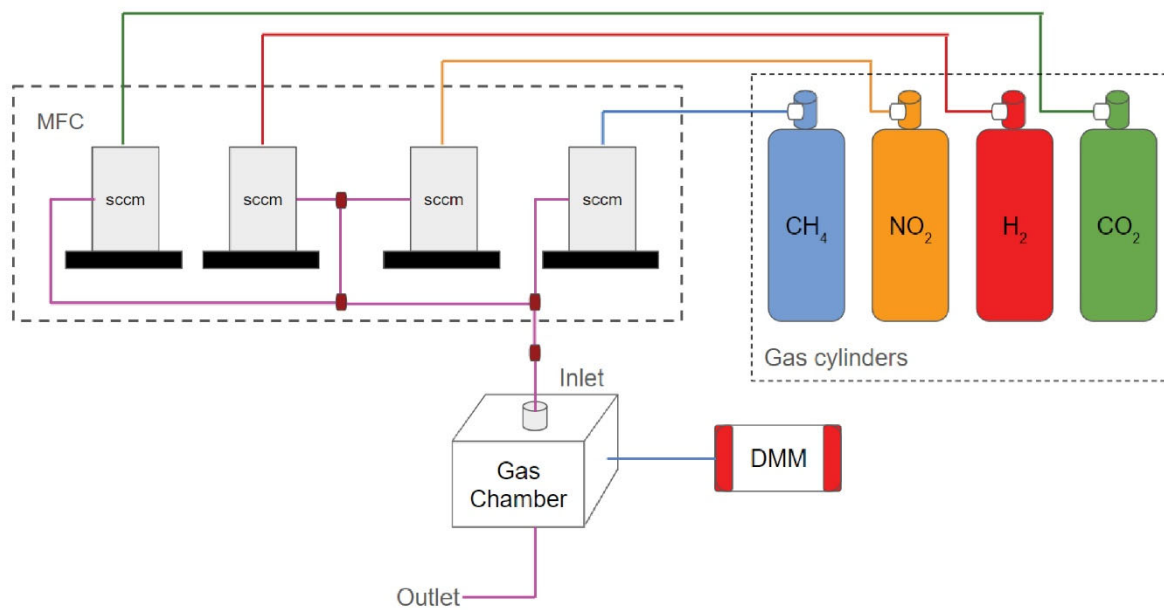

Figure S5: Gas sensing platform used for room temperature gas sensing experiment.
